# Supplementary material
Source: PubMed Central journal article supplement (PMC7063449)
Supplement: NIHMS1567356-supplement-GustavssonScienceSignaling2019Supplemental.pdf [file NIHMS1567356-supplement-GustavssonScienceSignaling2019Supplemental.pdf]

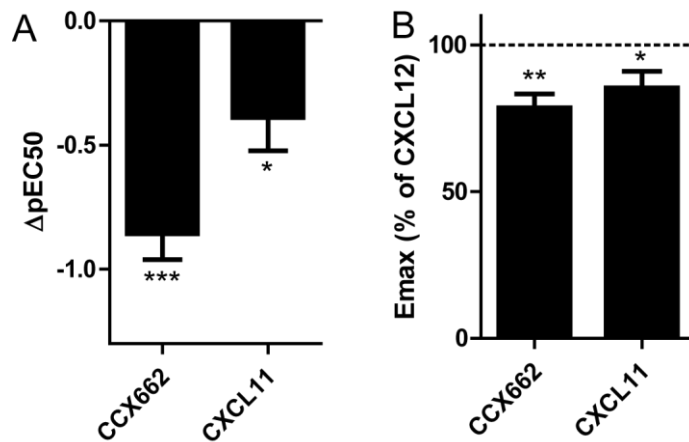

**Fig. S1.  $\beta$ -arrestin recruitment to ACKR3<sub>WT</sub> induced by CCX662 and CXCL11 in BRET experiments.** (A) Potency of activation relative to CXCL12 was calculated from  $\Delta pEC_{50} = pEC_{50, CXCL12} - pEC_{50, CCX662/CXCL11}$ . (B) Efficacy of CCX662 and CXCL11 normalized to CXCL12. Bars show the average and standard errors from five independent experiments. Significant differences for CCX662 and CXCL11 compared to CXCL12 are noted: \* $P < 0.05$ , \*\* $P < 0.01$ , \*\*\* $P < 0.001$  from one-way ANOVA with Dunnett's multiple comparison test.

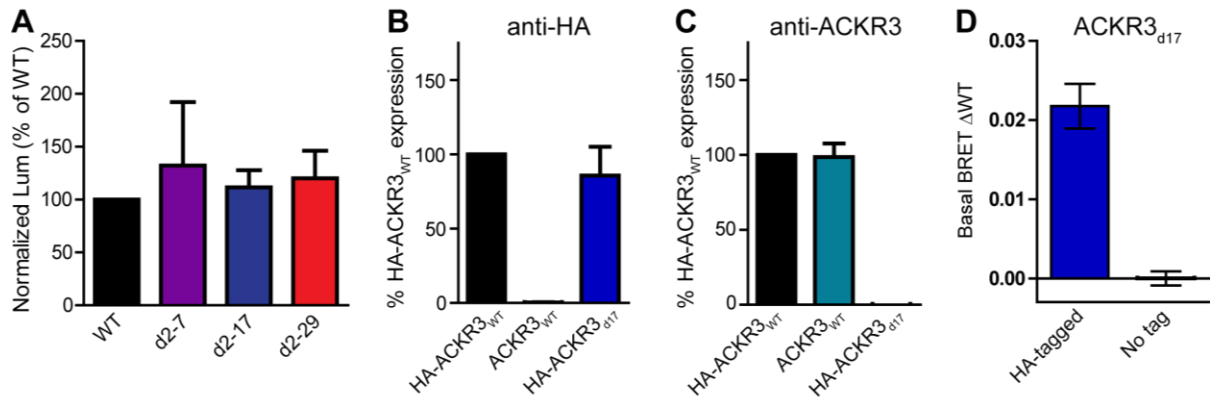

**Fig. S2. Expression of ACKR3 variants in HEK cells.** (A) Total expression in HEK293T cells determined by luminescence. Data were normalized to ACKR3<sub>WT</sub> expression from the same experiment according to  $\text{Lum}_{\text{mutant}}/\text{Lum}_{\text{WT}} \times 100$ . (B) Surface expression of ACKR3 in HEK293T cells quantified from anti-HA antibody staining. (C) Same samples as in (A) stained with an anti-ACKR3 antibody. Surface expression of ACKR3<sub>Δ17</sub> is not detectable with the anti-ACKR3 antibody since the truncation removes the epitope for antibody binding. (D) Constitutive association of GFP10-β-arrestin-2 in HEK293T cells to Rluc-fused receptors. Data in are means  $\pm$  SEM of three or more experiments.

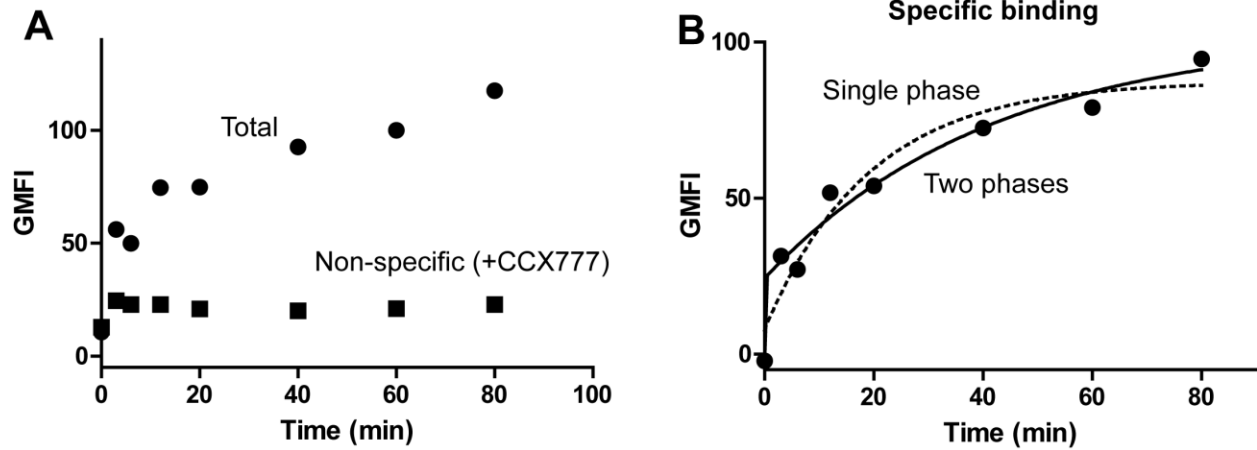

**Fig. S3. Kinetics of association of CXCL12 with ACKR3 on live *Sf9* cells.** (A) Representative example of association curve in the absence (total binding) and presence (non-specific binding) of the small molecule agonist CCX777 determined from the geometric mean fluorescent intensity (GMFI) of FITC-conjugated anti-HA antibody bound to CXCL12-HA. (B) Specific binding obtained by subtracting non-specific from total binding in (A). The fit of the association data is significantly improved with the use of a two-phase exponential function (solid line) compared to a single-phase exponential (dotted line). Data are representative of five experiments.

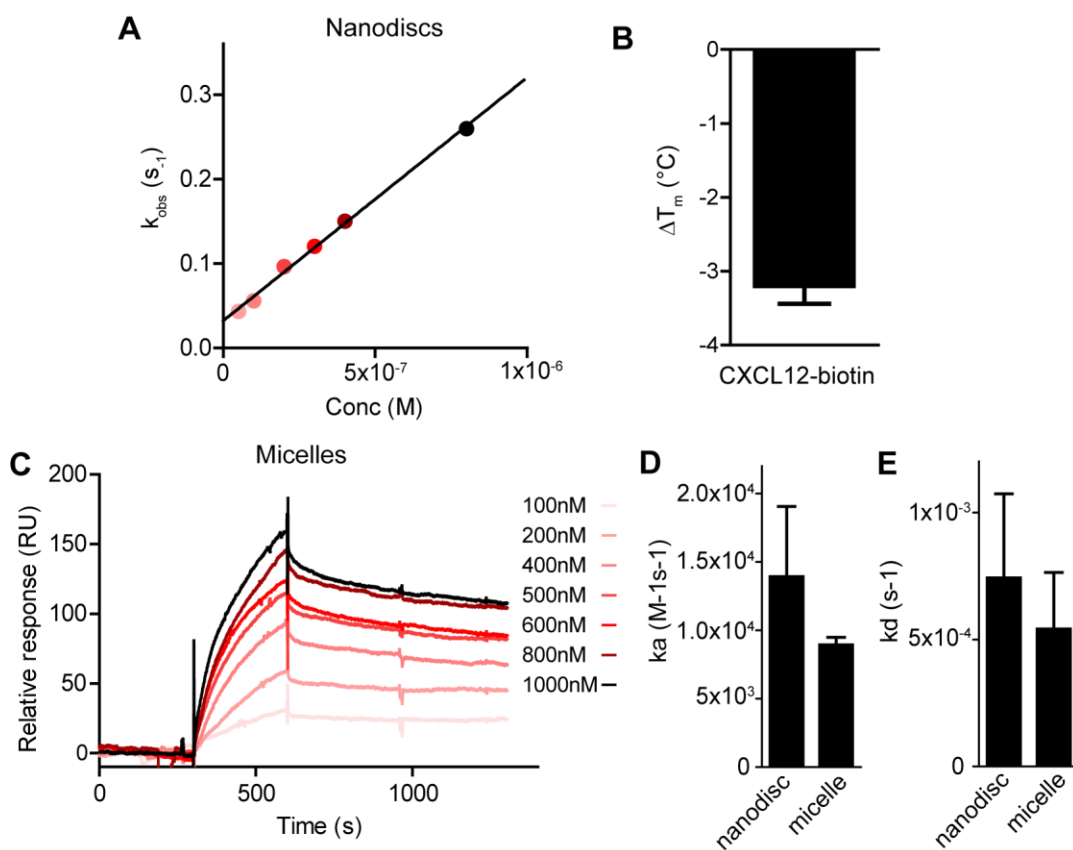

**Fig. S4. SPR in nanodiscs and detergent micelles.** (A) Analysis of CXCL12 binding for ACKR3 in nanodiscs. Plot of  $k_{\text{obs}}$  determined from fitting the association phase of the SPR curves at different concentrations of chemokine using a shared value for the dissociation rate constant ( $k_d$ ). Linear regression indicates that the data fits to a straight line with a correlation coefficient ( $R^2$ ) of 0.997. (B) Thermostability of ACKR3 in complex with biotinylated CXCL12 determined from CPM assays.  $\Delta T_m$  was determined as  $T_{m,\text{ACKR3:CXCL12-biotin}} - T_{m,\text{ACKR3:CXCL12}}$ . Bars show the average and standard error of three measurements. (C) SPR curves for the binding of ACKR3 in DDM/CHS detergent micelles to immobilized CXCL12-biotin at different concentrations of receptor. (D and E) Association ( $k_a$ ) and dissociation ( $k_d$ ) constants determined from fitting SPR data in micelles and nanodiscs from three separate experiments.

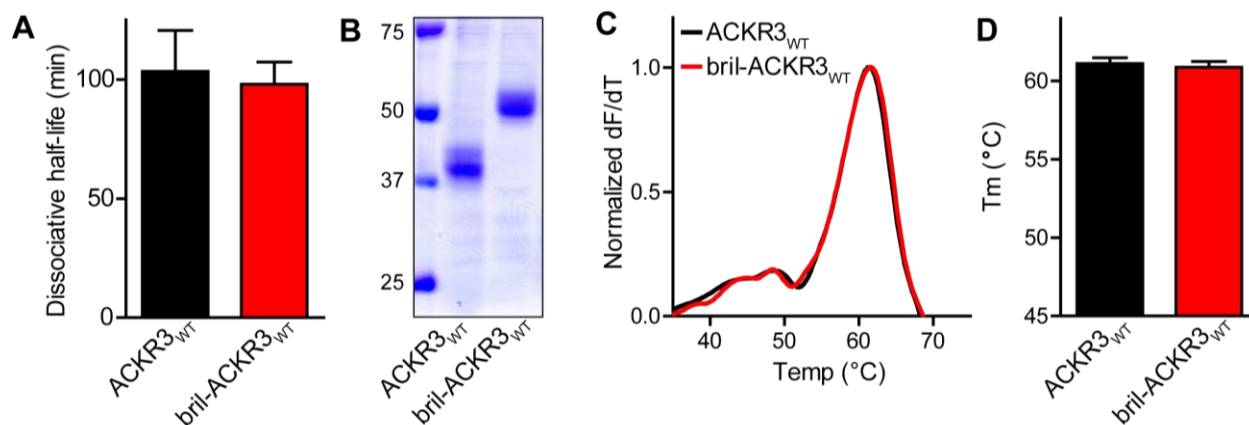

**Fig. S5. N-terminal cytochrome b562-RIL fusion protein did not affect CXCL12 dissociation rate or folding of ACKR3.** (A) Dissociative half-life for CXCL12 with ACKR3<sub>WT</sub> and bril-ACKR3<sub>WT</sub> in live *Sf9* cells. Bars correspond to averages and standard errors from n=4 (ACKR3<sub>WT</sub>) or n=8 (bril-ACKR3<sub>WT</sub>). (B) SDS-PAGE of ACKR3<sub>WT</sub> and bril-ACKR3<sub>WT</sub> purified from *Sf9* cells. (C) Thermostability of purified ACKR3<sub>WT</sub>:CXCL12<sub>WT</sub> and bril-ACKR3<sub>WT</sub>:CXCL12<sub>WT</sub> in detergent micelles measured by CPM fluorescence. Peaks at 61°C correspond to the midpoints of unfolding (T<sub>m</sub>) values. (D) Mean and standard errors of three T<sub>m</sub> measurements for ACKR3<sub>WT</sub> and bril-ACKR3<sub>WT</sub>.

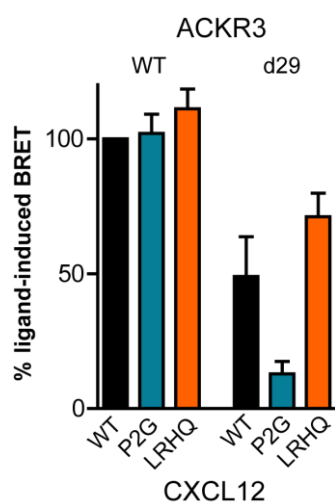

**Fig. S6. BRET signal increase after addition of 2 $\mu$ M chemokine for ACKR3<sub>WT</sub> and ACKR3<sub>d29</sub>.** % ligand-induced BRET was calculated as a percentage of CXCL12-induced BRET with ACKR3<sub>WT</sub> according to  $(\text{BRET}_{2\mu\text{M ligand}} - \text{BRET}_{\text{no ligand}}) / (\text{BRET}_{\text{ACKR3-WT, 2}\mu\text{M CXCL12}} - \text{BRET}_{\text{ACKR3-WT no ligand}}) \times 100$ . Data are means  $\pm$  SEM of three experiments.

|              | <b>Ref</b> | <b>Author</b> | <b>CXCR4</b> | <b>ACKR3</b> |
|--------------|------------|---------------|--------------|--------------|
| 1            | (33)       | Hanes         | 2.1          | 0.0014       |
| 2            | (47)       | Hoffmann      | 23.8         | 2.6          |
| 3            | (35)       | Szpakowska    | 12.9         | 1.8          |
| 4            | (38)       | Montpas       |              | 5.9          |
| 5            | (34)       | Benredjem     |              | 3.0          |
| 6            | (48)       | Wijtmans      |              | 0.63         |
| 7            | (49)       | Canals        |              | 0.2          |
| 8            | (50)       | Zabel         |              | 0.2          |
| 9            | (50)       | Zabel         |              | 0.07         |
| 10           | (50)       | Zabel         |              | 0.1          |
| 11           | (4)        | Burns         |              | 0.2          |
| 12           | (5)        | Rajagopal     |              | 0.2          |
| 13           | (51)       | Balabanian    |              | 0.8          |
| Average 1-3: |            |               | 12.9         | 1.47         |
| Average all: |            |               |              | 1.21         |

**Table S1. IC<sub>50</sub> values (nM) for equilibrium binding studies reported in literature.** Ref, reference; first author listed.
